# Supplementary material for: Gas phase kinetic and quantum chemical studies of the reactions of silylene with the methylsilanes. Absolute rate constants, temperature dependences, RRKM modelling and potential energy surfaces
Source: Royal Society of Chemistry journal article supplement (doi:10.1039/b613638a), 2007-01-01
Supplement: b613638a.pdf [file b613638a.pdf]

## Supplementary Information

### Gas-phase kinetic and quantum chemical studies of the reactions of silylene with the methylsilanes. Absolute Rate Constants, Temperature Dependences, RRKM modelling and Potential Energy surfaces.

Rosa Becerra, Ian W. Carpenter, Mark S Gordon, Luke Roskop, and Robin Walsh\*

#### Contents

**Fig. S1** Intermediate structures (local minima) found earlier in the reaction  $\text{SiH}_2 + \text{SiH}_4$ . (R. Becerra, H. M. Frey, B. P. Mason, R. Walsh and M. S. Gordon, *J. Chem. Soc., Faraday Trans.*, 1995, **91**, 2723).

**Table S1** Molecular and transition state parameters for RRKM calculation for methylidisilane decomposition at 600 K.

**Table S2** Molecular and transition state parameters for RRKM calculation for 1,1-dimethyldisilane decomposition at 600 K.

**Table S3** Molecular and transition state parameters for RRKM calculation for 1,1,1-trimethyldisilane decomposition at 625 K.

**Table S4** Some Lennard-Jones parameters.

**Table S5** Geometries (MP2/6-311G(d,p) level) for pathway 2.

**Table S6** Geometries (MP2/6-311G(d,p) level) for pathway 1.

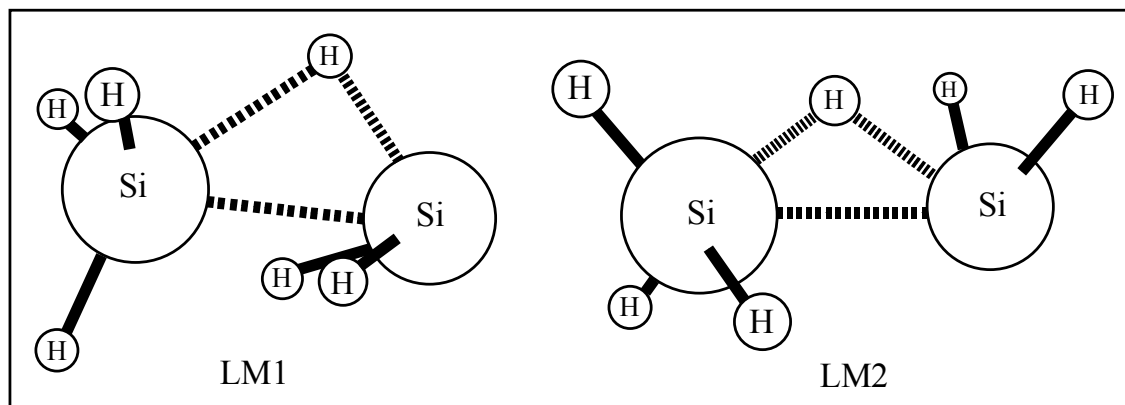

**Fig. S1** Intermediate structures (local minima) found earlier in the reaction  $\text{SiH}_2 + \text{SiH}_4$ . (R. Becerra, H. M. Frey, B. P. Mason, R. Walsh and M. S. Gordon, *J. Chem. Soc., Faraday Trans.*, 1995, **91**, 2723).

**Table S1** Molecular and transition state parameters for RRKM calculation for methylidisilane decomposition at 600 K.

|                                                                            | methylidisilane   | methylidisilane <sup>‡</sup> |
|----------------------------------------------------------------------------|-------------------|------------------------------|
| $\tilde{\nu}/\text{cm}^{-1}$                                               | 2960(3)           | 2960(3)                      |
|                                                                            | 2165(5)           | 2165(4)                      |
|                                                                            | 1450(2)           | 1600(1)                      |
|                                                                            | 1260(1)           | 1450(2)                      |
|                                                                            | 940(2)            | 1260(1)                      |
|                                                                            | 900(1)            | 940(1)                       |
|                                                                            | 880(1)            | 900(1)                       |
|                                                                            | 850(2)            | 850(2)                       |
|                                                                            | 700(1)            | 700(1)                       |
|                                                                            | 640(1)            | 640(1)                       |
|                                                                            | 630(1)            | 600(1)                       |
|                                                                            | 590(1)            | 590(1)                       |
|                                                                            | 470(1)            | 585(1)                       |
|                                                                            | 400(1)            | 470(1)                       |
|                                                                            | 380(1)            | 185(1)                       |
|                                                                            | 185(1)            | 150(1)                       |
|                                                                            | 150(1)            | 120(1)                       |
|                                                                            | 120(1)            | 100(1)                       |
|                                                                            |                   | 80(1)                        |
| reaction coordinate/ $\text{cm}^{-1}$                                      | 400               |                              |
| path degeneracy                                                            | 3                 |                              |
| $E_0(\text{critical energy})/\text{kJ mol}^{-1}$                           | 204.6             |                              |
| $Z_{\text{LJ}}/10^{-10} \text{ cm}^3 \text{ molecule}^{-1} \text{ s}^{-1}$ | 5.20 <sup>a</sup> |                              |

<sup>a</sup> Value in SF<sub>6</sub>, calculated using the formulas recommended by Troe. (J. Troe, *J. Chem. Phys.*, 1977, **66**, 4758).

**Table S2** Molecular and transition state parameters for RRKM calculation for 1,1-dimethyldisilane decomposition at 600 K.

|                                                                            | dimethyldisilane  | dimethyldisilane <sup>‡</sup> |
|----------------------------------------------------------------------------|-------------------|-------------------------------|
| $\tilde{\nu}/\text{cm}^{-1}$                                               | 2960(6)           | 2960(6)                       |
|                                                                            | 2165(4)           | 2165(3)                       |
|                                                                            | 1450(4)           | 1600(1)                       |
|                                                                            | 1260(2)           | 1450(4)                       |
|                                                                            | 940(2)            | 1260(2)                       |
|                                                                            | 900(1)            | 940(1)                        |
|                                                                            | 880(1)            | 900(1)                        |
|                                                                            | 850(4)            | 850(4)                        |
|                                                                            | 700(2)            | 700(2)                        |
|                                                                            | 630(1)            | 615(1)                        |
|                                                                            | 615(1)            | 550(1)                        |
|                                                                            | 400(1)            | 407(1)                        |
|                                                                            | 380(1)            | 185(3)                        |
|                                                                            | 185(3)            | 150(2)                        |
|                                                                            | 150(2)            | 120(1)                        |
|                                                                            | 120(1)            | 90(1)                         |
|                                                                            |                   | 80(1)                         |
| reaction coordinate/ $\text{cm}^{-1}$                                      | 400               |                               |
| path degeneracy                                                            | 3                 |                               |
| $E_0(\text{critical energy})/\text{kJ mol}^{-1}$                           | 204.7             |                               |
| $Z_{\text{LJ}}/10^{-10} \text{ cm}^3 \text{ molecule}^{-1} \text{ s}^{-1}$ | 5.39 <sup>a</sup> |                               |

<sup>a</sup> Value in SF<sub>6</sub>, calculated using the formulas recommended by Troe. (J. Troe, *J. Chem. Phys.*, 1977, **66**, 4758).

**Table S3** Molecular and transition state parameters for RRKM calculation for 1,1,1-trimethyldisilane decomposition at 625 K.

|                                                                            | trimethyldisilane | trimethyldisilane <sup>‡</sup> |
|----------------------------------------------------------------------------|-------------------|--------------------------------|
| $\tilde{\nu}/\text{cm}^{-1}$                                               | 2960(9)           | 2960(9)                        |
|                                                                            | 2165(3)           | 2165(2)                        |
|                                                                            | 1450(6)           | 1600(1)                        |
|                                                                            | 1260(3)           | 1450(6)                        |
|                                                                            | 940(2)            | 1260(3)                        |
|                                                                            | 880(1)            | 940(1)                         |
|                                                                            | 850(6)            | 850(6)                         |
|                                                                            | 700(3)            | 700(3)                         |
|                                                                            | 630(1)            | 600(1)                         |
|                                                                            | 400(1)            | 550(1)                         |
|                                                                            | 380(1)            | 185(5)                         |
|                                                                            | 185(5)            | 162(1)                         |
|                                                                            | 150(3)            | 150(3)                         |
|                                                                            | 120(1)            | 120(1)                         |
|                                                                            |                   | 80(1)                          |
| reaction coordinate/ $\text{cm}^{-1}$                                      | 400               |                                |
| path degeneracy                                                            | 3                 |                                |
| $E_0(\text{critical energy})/\text{kJ mol}^{-1}$                           | 198.9             |                                |
| $Z_{\text{LJ}}/10^{-10} \text{ cm}^3 \text{ molecule}^{-1} \text{ s}^{-1}$ | 5.85 <sup>a</sup> |                                |

<sup>a</sup> Value in SF<sub>6</sub>, calculated using the formulas recommended by Troe.  
(J. Troe, *J. Chem. Phys.*, 1977, **66**, 4758).

**Table S4** Some Lennard-Jones parameters.<sup>a</sup>

| Molecule                            | $\sigma/\text{\AA}$ | $(\epsilon/k)/\text{K}$ |
|-------------------------------------|---------------------|-------------------------|
| SF <sub>6</sub>                     | 5.13                | 222                     |
| MeSiH <sub>2</sub> SiH <sub>3</sub> | 5.30                | 335                     |
| Me <sub>2</sub> SiHSiH <sub>3</sub> | 5.80                | 365                     |
| Me <sub>3</sub> SiSiH <sub>3</sub>  | 6.30                | 395                     |

<sup>a</sup> Values or estimates based on data from Reid et al. (R.C. Reid, J. M. Prausnitz and B. E. Poling, *The properties of gases and liquids*, 4<sup>th</sup> edn., McGraw-Hill, New York, 1988).

**Table S5** Geometries (MP2/6-311G(d,p) level) for pathway 2. Bond lengths in Å, angles in degrees.

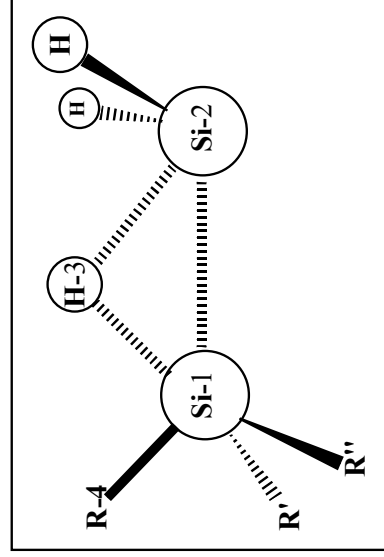

| Reaction                                            | LM bond |      | LM angle |       | TS bond |      | TS angle |       | TS angle |
|-----------------------------------------------------|---------|------|----------|-------|---------|------|----------|-------|----------|
|                                                     | 1,2     | 2,3  | 1,2,3    | 3,1,4 | 1,2     | 2,3  | 1,2,3    | 3,1,4 |          |
| SiH <sub>2</sub> + SiH <sub>4</sub>                 | 2.70    | 1.76 | 32.8     | 97.0  | 2.45    | 1.66 | 42.9     | 87.1  | 87.1     |
| SiH <sub>2</sub> + MeSiH <sub>3</sub>               | 2.68    | 1.73 | 33.5     | 94.7  | 2.47    | 1.66 | 42.1     | 86.8  | 86.8     |
| SiH <sub>2</sub> + Me <sub>2</sub> SiH <sub>2</sub> | 2.67    | 1.71 | 33.8     | 92.8  | 2.46    | 1.65 | 43.0     | 84.8  | 84.8     |
| SiH <sub>2</sub> + Me <sub>3</sub> SiH              | 2.74    | 1.71 | 31.4     | 95.5  | 2.46    | 1.63 | 44.0     | 85.5  | 85.5     |

**Table S6** Geometries (MP2/6-311G(d,p) level) for pathway 1. Bond lengths in Å, angles in degrees.

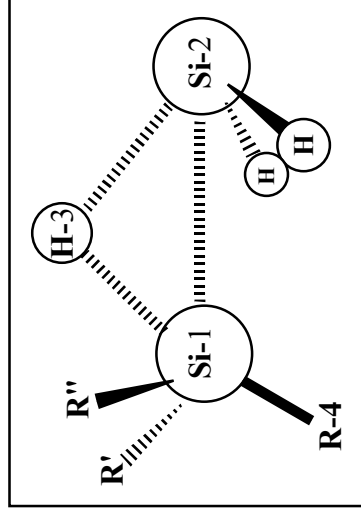

| Reaction                              | LM bond 1,2 | LM bond 2,3 | LM angle 1,2,3 | LM angle 3,1,4 | TS bond 1,2 | TS bond 2,3 | TS angle 1,2,3 | TS angle 3,1,4 |
|---------------------------------------|-------------|-------------|----------------|----------------|-------------|-------------|----------------|----------------|
| SiH <sub>2</sub> + SiH <sub>4</sub>   | 2.47        | 1.53        | 55.9           | 148.6          | 2.49        | 1.5         | 64.2           | 146.4          |
| SiH <sub>2</sub> + MeSiH <sub>3</sub> | 2.49        | 1.53        | 52.4           | 149.9          | 2.5         | 1.49        | 63.9           | 147.6          |
